# Supplementary material
Source: HighWire-hosted journal article supplement (https://cmaj.ca/highwire/filestream/57678/field_highwire_adjunct_files/0/image-crean-1-at.pdf)
Supplement: image-crean-1-at.pdf [file image-crean-1-at.pdf]

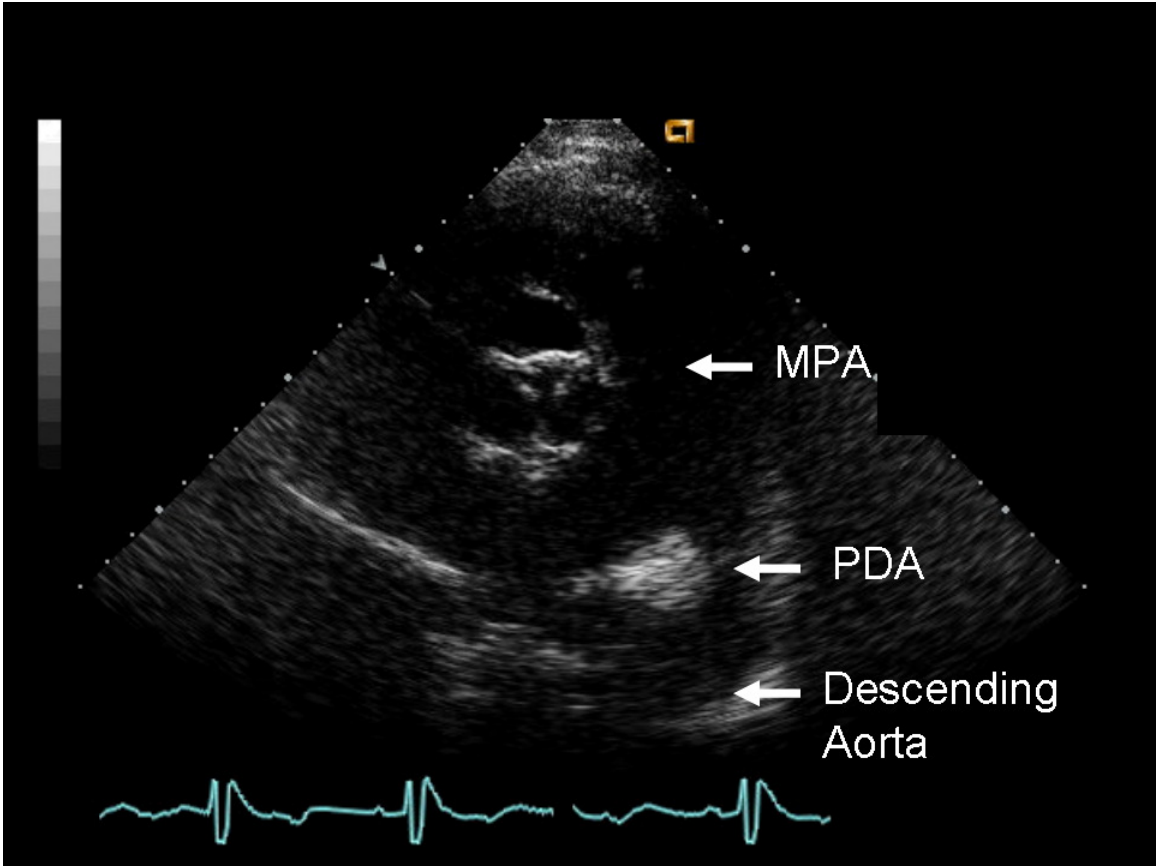

**Figure 1:** Parasternal short axis 2-dimensional echocardiogram showing the patent ductal connection between the aorta and left main pulmonary artery (MPA) in a patient with Eisenmenger syndrome. PDA = patent ductus arteriosus.

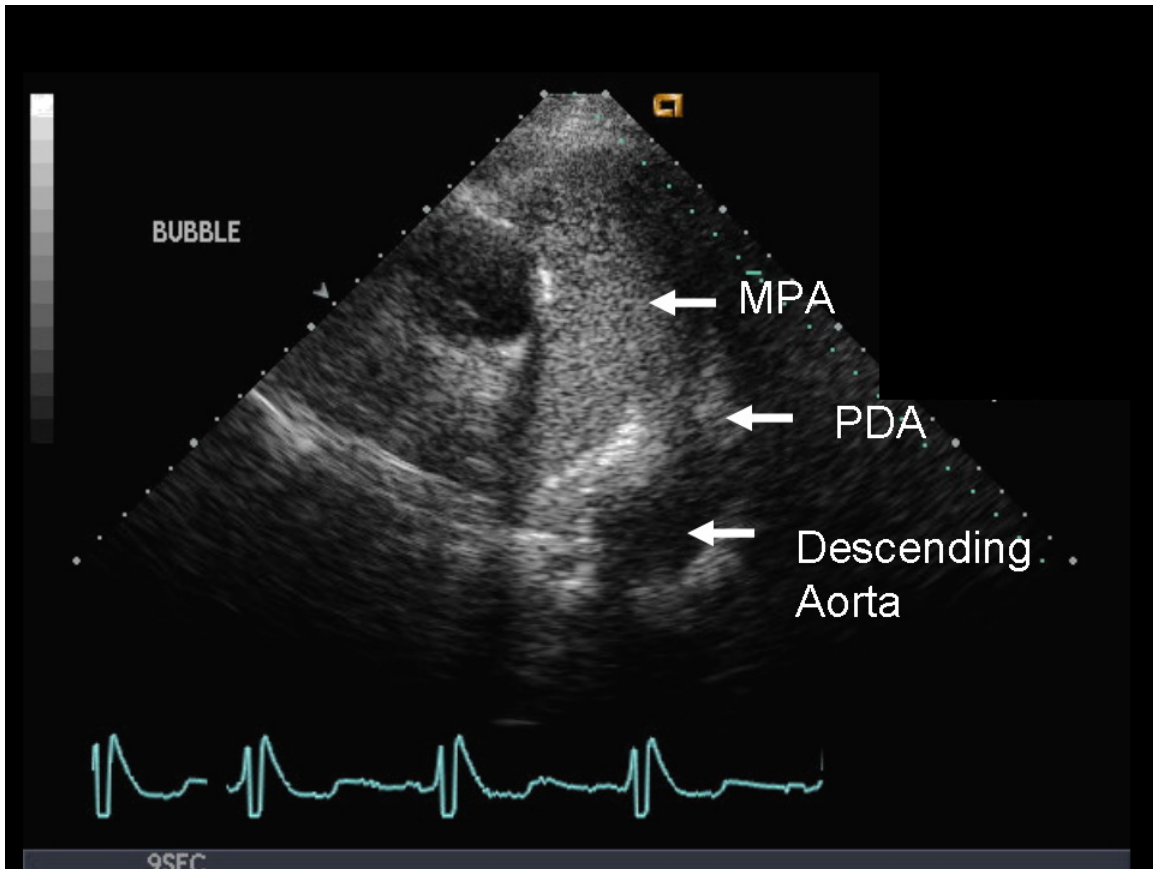

**Figure 2:** Echocardiogram showing the patent ductus arteriosus (PDA), highlighted by the use of intravenous echo bubble contrast. MPA = main pulmonary artery.

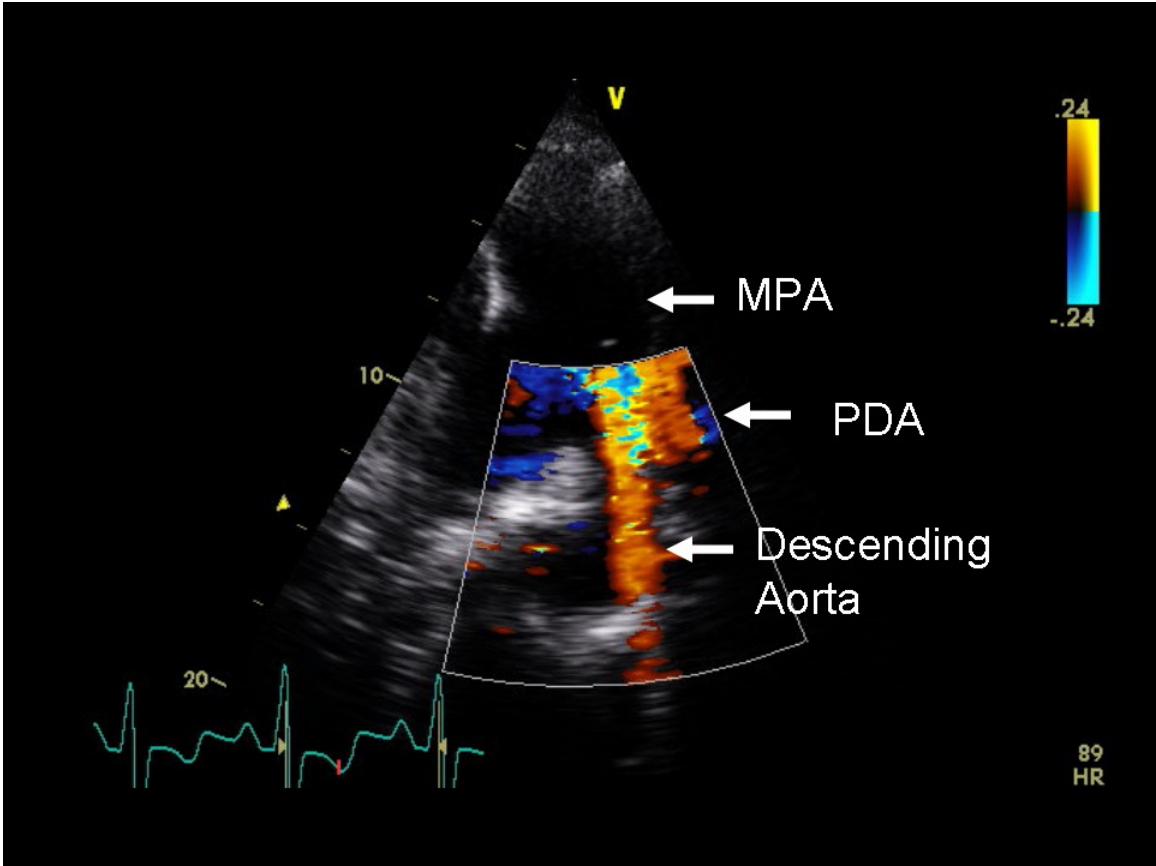

**Figure 3:** This systolic colour Doppler image shows flow through the patent ductus arteriosus (PDA) from the aorta to the left main pulmonary artery (MPA).

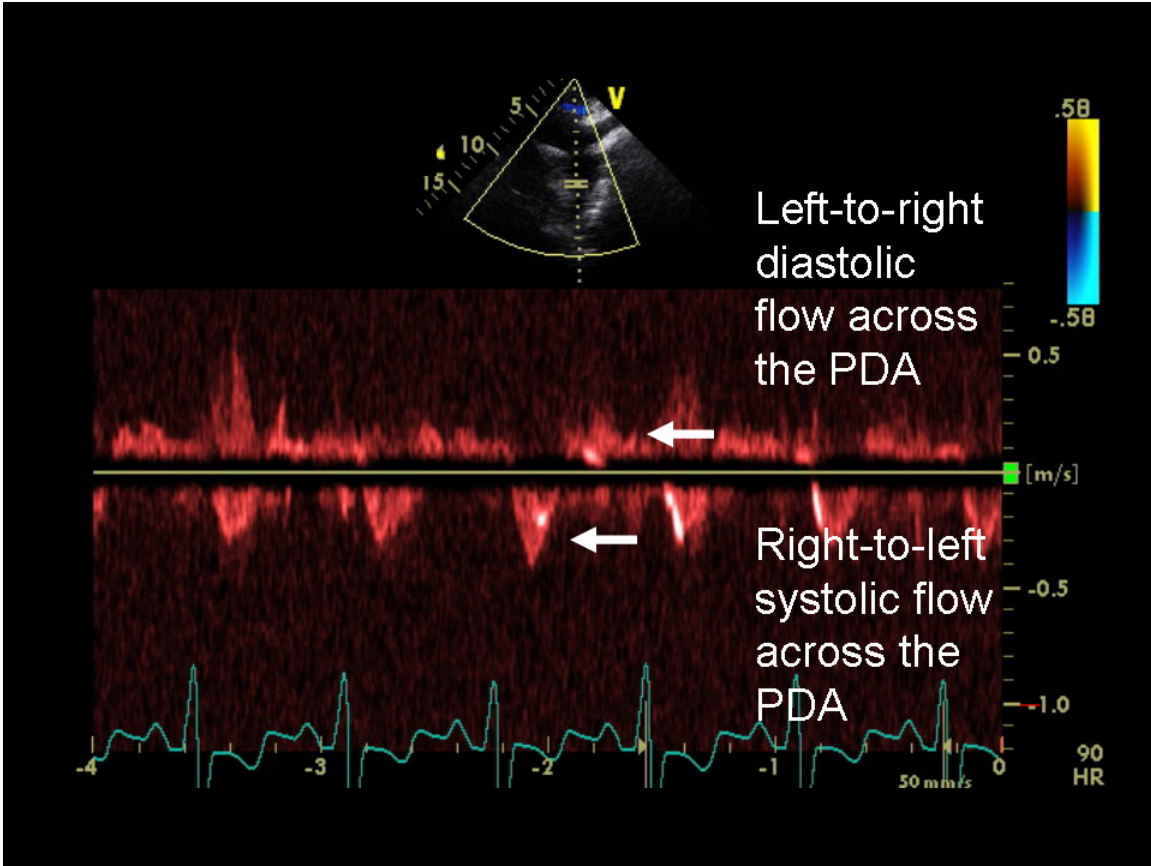

**Figure 4:** Doppler echocardiogram showing waveforms through the patent ductus arteriosus (PDA), which show bidirectional flow with dominant flow direction reversing according to phase of the cardiac cycle.

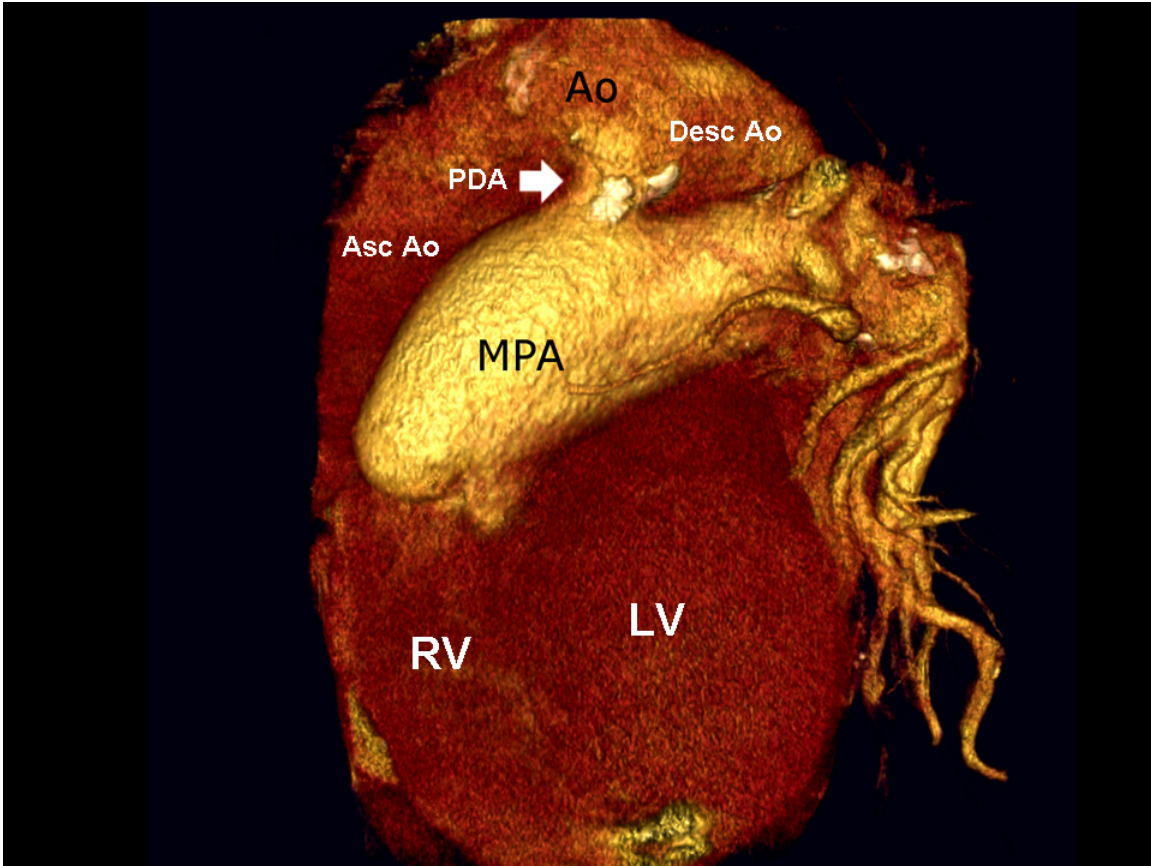

**Figure 5:** Volume-rendered 3-dimensional image of the patient's heart as captured by cardiac-gated computed tomography. The relation of the patent ductus arteriosus (PDA, white arrow) to the aorta (Ao), left main pulmonary artery (MPA) and ventricular mass is shown. Asc Ao = ascending aorta; Desc Ao = descending aorta; LV = left ventricle; RV = right ventricle.
